# Supplementary material
Source: PubMed Central journal article supplement (PMC7615005)
Supplement: EMS185292-supplement-Supplementary_Material.pdf [file EMS185292-supplement-Supplementary_Material.pdf]

# **A discrete subset of epigenetically primed human NK cells mediates antigen-specific immune responses**

Victoria Stary<sup>1</sup>, Ram Vinay Pandey<sup>2</sup>, Johanna Strobl<sup>2</sup>, Lisa Kleissl<sup>2,3</sup>, Patrick Starlinger<sup>1,4</sup>, David Pereyra<sup>1,5</sup>, Wolfgang Weninger<sup>2</sup>, Gottfried F. Fischer<sup>6</sup>, Christoph Bock<sup>7,8</sup>, Matthias Farlik<sup>2,#</sup>, Georg Stary<sup>2,3,7,#,\*</sup>

## **Supplementary Materials**

Figure S1. Phenotypic characterization of human liver NK cells

Figure S2. Transcriptomic and epigenomic differences in NK cell subtypes

Figure S3. Functional aspects of CD49a<sup>+</sup>CD16<sup>-</sup> NK cells

Table S1. List of differentially regulated genes in Smart-seq2 bulk RNA sequencing (Excel spreadsheet)

Table S2. List of accessible regions Smart-seq2 ATAC-seq sequencing (Excel spreadsheet)

Table S3. HOMER enrichment motifs of cell types (Excel spreadsheet)

Table S4. List of differentially regulated genes in Smart-seq2 single cell RNA sequencing after killing assay (Excel spreadsheet)

Table S5. Characteristics of individuals for liver tissue.

Table S6. Characteristics of individuals with nickel-induced epicutaneous patch test (Ni-ECT).

Table S7. Antibodies used in this study.

Table S8. Raw data file (Excel spreadsheet)

## Supplementary Figure 1.

**a** Single cell RNA-seq on liver CD45+ cells superimposed with expression patterns of known marker genes for ILC subtype characterization

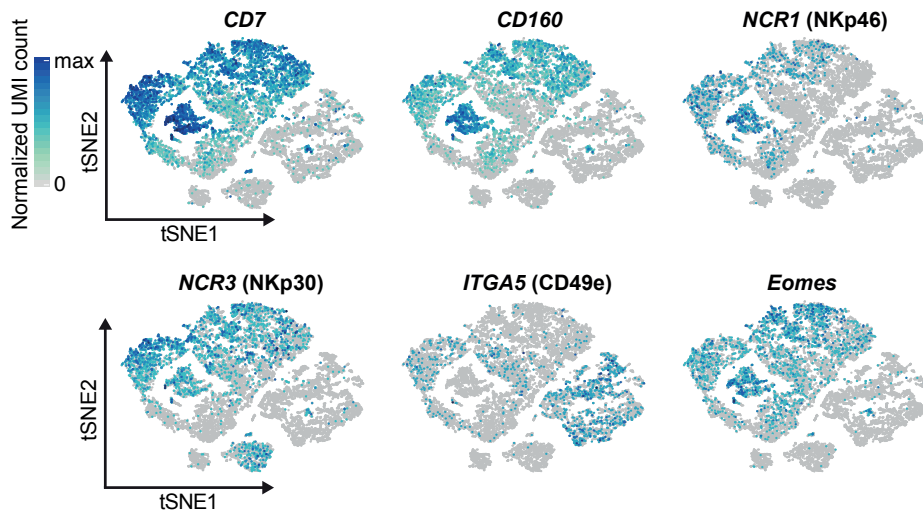

**b** Representative dot plots NK cells with anti-CD49a, anti-CD16 and isotype control

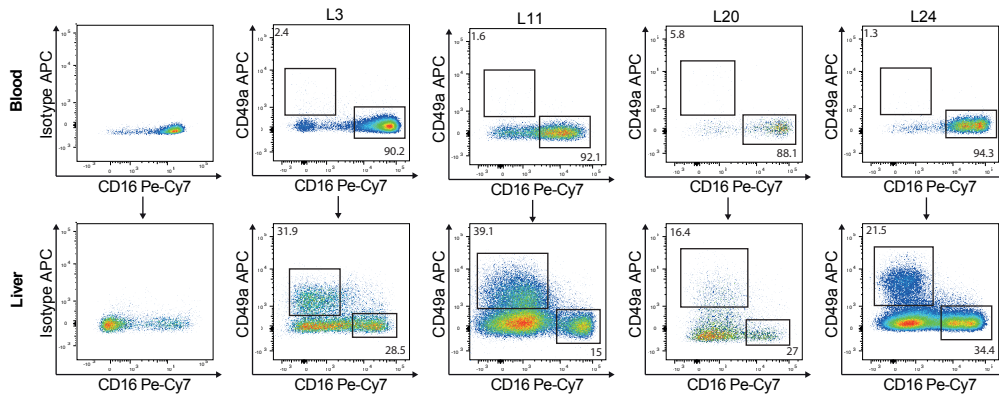

**c** CD49a+CD16- NK cells by diagnosis

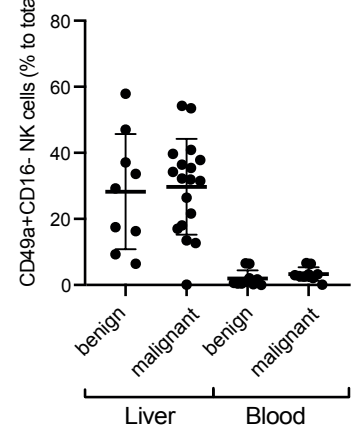

**d** Single cell RNA-seq on liver CD45+ cells superimposed with expression patterns of known marker genes of CMV driven adaption of NK cells

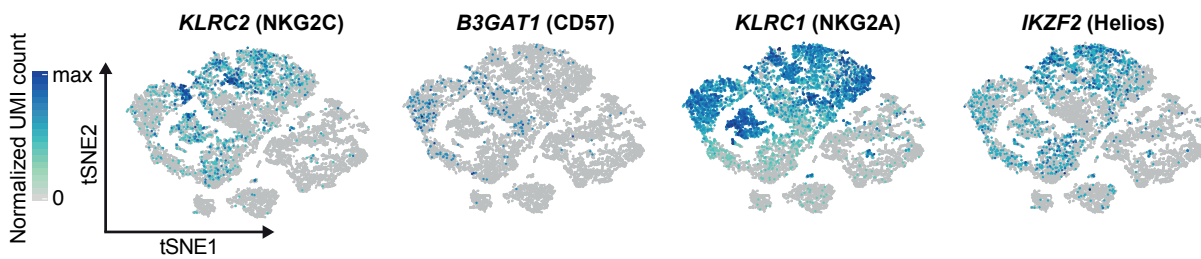

**e** CD16 and NKG2C expression of NK cells

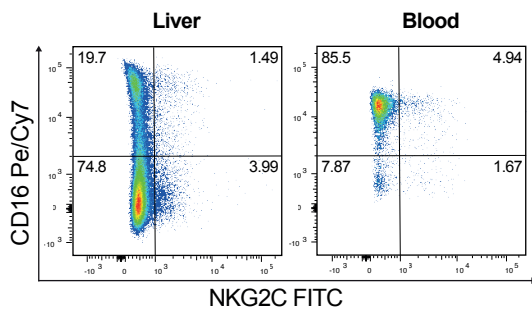

**f** Mean expression of NKG2C

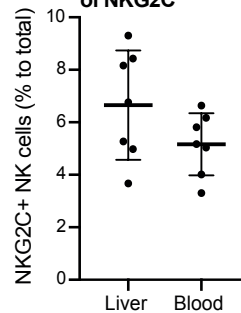

**g** Markers expressed by NKG2C+ NK cells

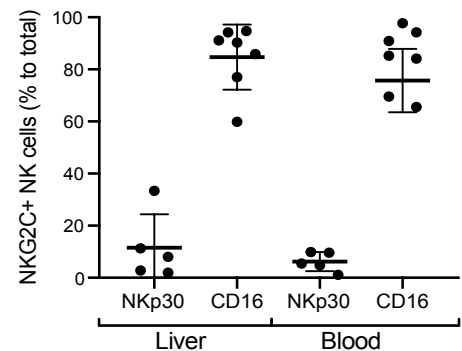

**Figure S1.** Phenotypic characterization of human liver NK cells. **a**, t-SNE projection of Smart-seq2 single-cell sequencing on human hepatic CD45<sup>+</sup> leukocytes superimposed with expression pattern of known marker genes for ILCs. UMI normalized expression of indicated genes within the depicted clusters. **b**, Representative dot plots of stainings of liver- and blood-derived NK cells with anti-CD49a, anti-CD16 and an isotype control. These staining show inter-individual variability with a substantial population of CD49a<sup>+</sup>CD16<sup>-</sup> NK cells in all liver samples. **c**, Mean percentage of CD49a<sup>+</sup>CD16<sup>-</sup> NK cells of liver and blood listed according to the diagnosis. **d**, t-SNE projection of Smart-seq2 single-cell sequencing on human hepatic CD45<sup>+</sup> leukocytes superimposed with expression pattern of known marker genes for CMV-driven adaptive NK cells. UMI normalized expression of indicated genes within the depicted clusters. **e**, Representative FACS plots of expression of CD16 and NKG2C of NK cells in liver and blood. **f**, Mean percentage of NK cells expressing NKG2C in liver and blood. **g**, Mean percentage of NKG2C<sup>+</sup> NK cells expressing depicted markers in liver and blood.

# Supplementary Figure 2.

**a**

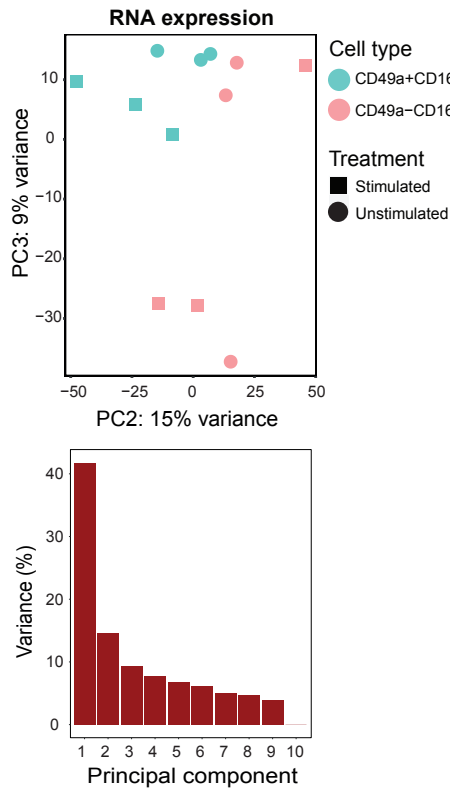

**b**

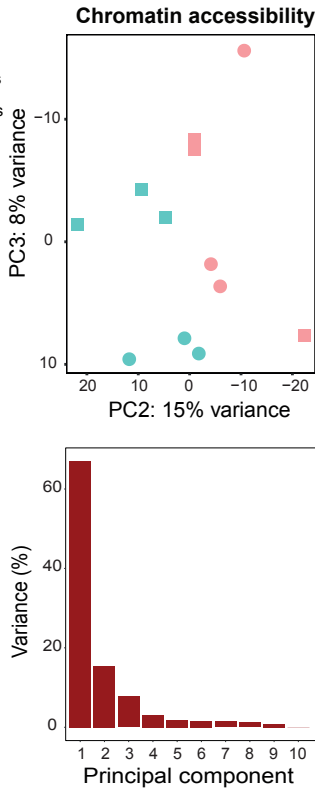

**c**

## Gene expression analysis of factors identified with Homer enrichment

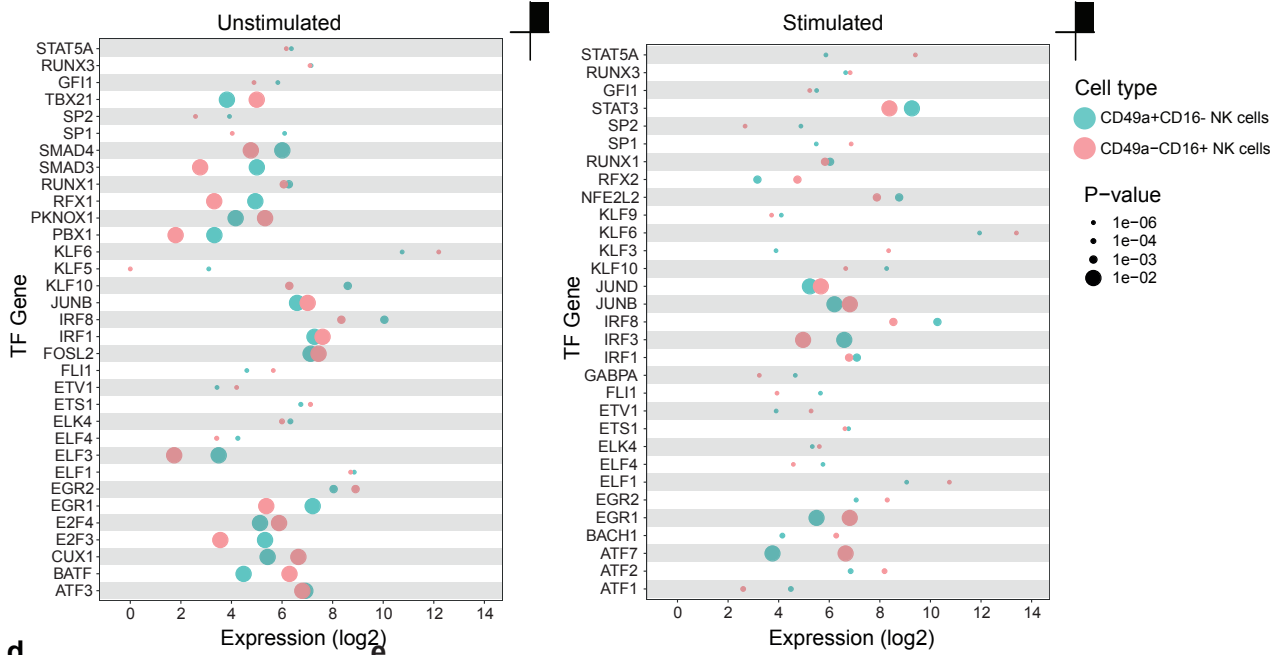

**d**

## Number of genes differentially expressed and accessible

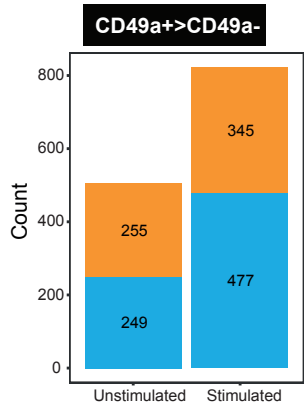

**e**

## LOLA enrichment of promoter regions of 255 genes displaying increased expression and accessibility

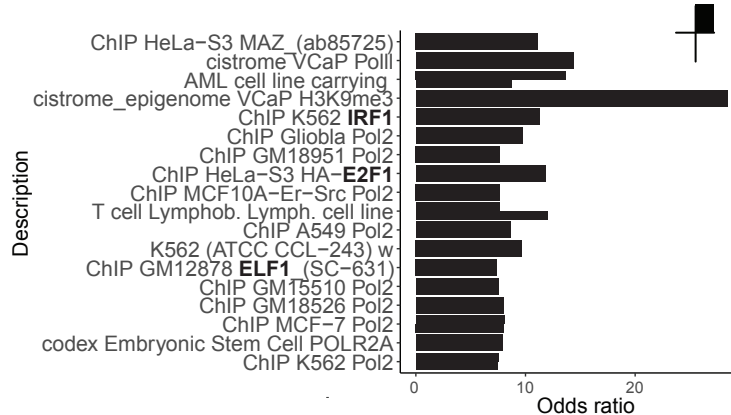

**Figure S2.** Transcriptomic and epigenomic differences in NK cell subtypes. **a**, PCA analysis with Principal component 2 (PC2) and Principal component 3 (PC3) of the same set of genes as Figure 2a (top). The bar plot (bottom) shows the distribution of 10 principal components. **b**, PCA analysis of ATAC-seq data with Principal component 2 (PC2) and Principal component 3 (PC3) of the same set of differentially accessible (DA) regions as Figure 2b (top). The bar plot (bottom) shows the distribution of 10 principal components. **c**, Transcriptional presence of factors significantly enriched in accessible regions comparing unstimulated and stimulated NK cells and also comparing CD49a<sup>+</sup>CD16<sup>-</sup> and CD49a<sup>-</sup>CD16<sup>-</sup> NK cells in either unstimulated or stimulated conditions (normalized log<sub>2</sub>). The size of the circles reflects the HOMER motif enrichment p-values. **d**, Stacked bar plot displaying the number of gained DA peaks at promotor regions in the comparison of CD49a<sup>+</sup>CD16<sup>-</sup> NK cells versus CD49a<sup>-</sup>CD16<sup>-</sup> NK cells either in unstimulated or stimulated conditions. Peaks associated with upregulated genes (orange color) and peaks without association with up-regulated genes (blue color) **e**, LOLA enrichment analysis for top associated factors on accessible regions with concomitant changes in expression comparing CD49a<sup>+</sup>CD16<sup>-</sup> NK cells and CD49a<sup>-</sup>CD16<sup>+</sup> NK cells in unstimulated conditions (odds ratio).

# Supplementary Figure 3.

## a Activation of CD20+ B cells

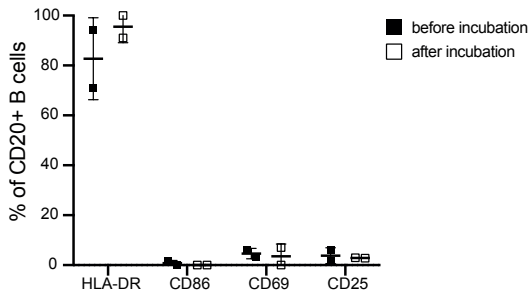

## b Killing Assay with Dendritic Cells as target cells

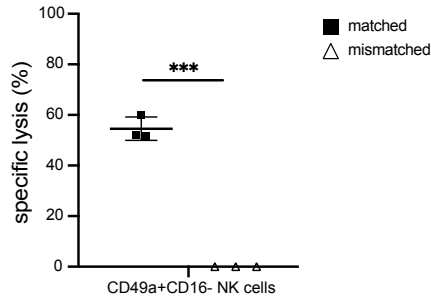

## c Killing assay with filler cells

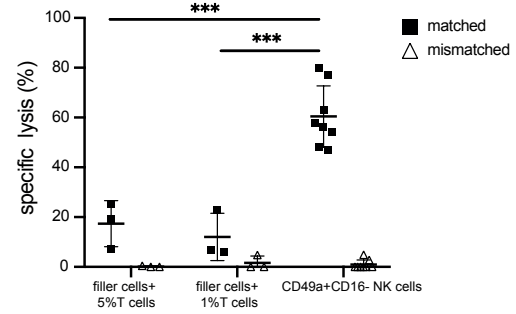

## d Post sorting hepatic CD49a+CD16- NK cells

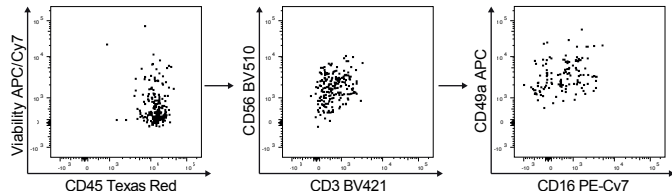

## e Killing assay CD49a-CD16-NK cells

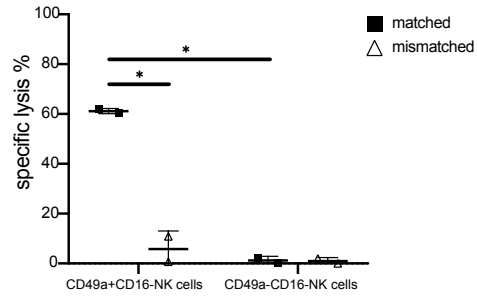

## f RNA expression

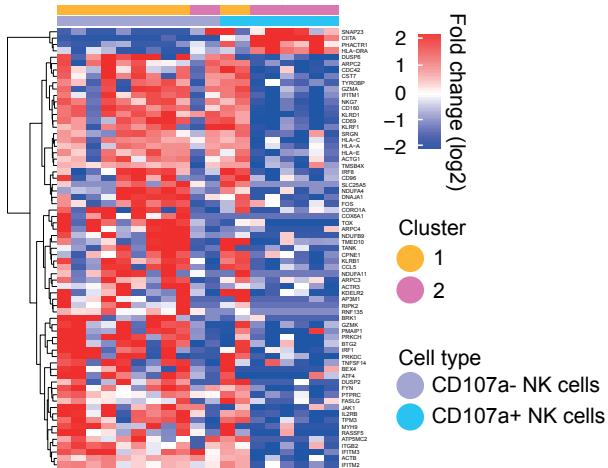

**Figure S3.** Functional aspects of CD49a<sup>+</sup>CD16<sup>-</sup> NK cells. **a**, Mean expression of activation marker on CD20<sup>+</sup> B cells before and after incubation with antigen proteins. Data points represent the mean of positive B cells  $\pm$  SD. n = 2. **b**, Antigen-specific lysis of autologous dendritic cells as target cells incubated with matched/mismatched antigens by hepatic CD49a<sup>+</sup>CD16<sup>-</sup> NK cells with an effector: target cell ratio of 1:10. n = 3. \*\*\*P < 0.0001. **c**, Antigen-specific lysis of autologous B cells pulsed with matched/mismatched antigens by filler cells plus 5% and 1% CD8<sup>+</sup> effector T cells. This did not lead to a lysis comparable to CD49a<sup>+</sup>CD16<sup>-</sup> hepatic NK cells as controls. The effector: target cell ratio was 1:10; n = 3 (filler cells); n = 8 (positive control). \*\*\*P < 0.0001. **d**, Representative dot plots post-sorting of CD49a<sup>+</sup>CD16<sup>-</sup> NK cells and CD49a<sup>-</sup>CD16<sup>+</sup> NK cells. **e**, Antigen-specific lysis of CD49a<sup>-</sup>CD16<sup>-</sup> NK cells compared to CD49a<sup>+</sup>CD16<sup>-</sup> hepatic NK cells against autologous B cells pulsed with matched/mismatched antigens. The effector: target cell ratio was 1:10; n = 2. \*P < 0.01. **f**, Single-cell Smart-seq2 sequencing was performed after an antigen-specific cytotoxicity assay (shown in Fig. 3i). Complete heat map of differentially expressed genes in the two identified clusters of CD107a<sup>+/-</sup> CD49a<sup>+</sup>CD16<sup>-</sup> NK cells (analogous to Fig. 3k).

**Table S5.** Characteristics of individuals for liver tissue. Data presented as total numbers.

| Patient | Age | Gender | Tumor                       |
|---------|-----|--------|-----------------------------|
| L1      | 60  | Female | Klatskin tumor              |
| L2      | 77  | Female | Cholangiocellular carcinoma |
| L3      | 82  | Male   | Colorectal carcinoma        |
| L4      | 46  | Female | Hemangioma                  |
| L5      | 54  | Male   | Neuroendocrine tumor        |
| L6      | 45  | Female | Colorectal carcinoma        |
| L7      | 37  | Male   | Adenoma                     |
| L8      | 68  | Female | Colorectal carcinoma        |
| L9      | 73  | Female | Angiomyolipoma              |
| L10     | 65  | Male   | Hepatocellular carcinoma    |
| L11     | 39  | Female | Adenoma                     |
| L12     | 78  | Male   | Hepatocellular carcinoma    |
| L13     | 70  | Male   | Hepatocellular carcinoma    |
| L14     | 47  | Female | Schwannoma                  |
| L15     | 78  | Male   | Colorectal carcinoma        |
| L16     | 62  | Male   | Hepatocellular carcinoma    |
| L19     | 58  | Female | Liver cysts                 |
| L20     | 75  | Male   | Colorectal carcinoma        |
| L21     | 53  | Female | Adenoma                     |
| L22     | 69  | Male   | Cholangiocellular carcinoma |
| L23     | 66  | Male   | Colorectal carcinoma        |
| L24     | 38  | Female | Focal nodular hyperplasia   |
| L25     | 66  | Male   | Colorectal carcinoma        |
| L26     | 75  | Male   | Hepatocellular carcinoma    |
| L27     | 76  | Male   | Hepatocellular carcinoma    |
| L28     | 58  | Female | Liver cysts                 |
| L30     | 45  | Female | Cholangiocellular carcinoma |



**Table S6.** Characteristics of individuals with nickel-induced epicutaneous patch test (Ni-ECT).

Data presented as total numbers.

| Patient | Age | Gender | Grade NI-ECT |
|---------|-----|--------|--------------|
| 1       | 29  | Female | III          |
| 2       | 50  | Female | II           |
| 3       | 67  | Female | II           |
| 4       | 52  | Female | III          |

**Table S7.** Antibodies used in this study.

| Antibody specificity | Clone (source of antibodies) | Isotype |
|----------------------|------------------------------|---------|
| CD3                  | UCHT1                        | IgG1    |
| CD8                  | SK1                          | IgG1    |
| CD16                 | B73.1                        | IgG1    |
| CD20                 | 2H7                          | IgG2b   |
| CD45                 | HI30                         | IgG1    |
| CD49a                | TS2/7                        | IgG1    |
| CD49b                | P1E6-C5                      | IgG1    |
| CD56                 | HCD56                        | IgG1    |
| CD57                 | HNK-1                        | IgM     |
| CD69                 | FN50                         | IgG1    |
| CD94                 | DX22                         | IgG1    |
| CD107a               | H4A3                         | IgG1    |
| CD160                | BY55                         | IgM     |
| CD244                | C1.7                         | IgG1    |
| PD-1                 | EH12.2H7                     | IgG1    |
| Siglec7              | 6-434                        | IgG1    |
| NKG2A/CD94           | 131411                       | IgG2a   |
| NKG2C/CD159c         | 134522                       | IgG2a   |
| NKG2D                | 1D11                         | IgG1    |
| NKp30                | P30-15                       | IgG1    |
| NKp46                | BAB281                       | IgG1    |
| KIR2DL1/S1/S3/S5     | HP-MA4                       | IgG2b   |
| LIR-1                | GHI/75                       | IgG2b   |
| CCR2                 | K036C2                       | IgG2b   |
| CCR3                 | J073E5                       | IgG2a   |
| CCR4                 | 1G1                          | IgG1    |
| CCR5                 | CTC5R                        | IgG1    |
| CCR8                 | L263G8                       | IgG2a   |
| CCR10                | 314305                       | IgG2a   |
| CXCR1                | 8F1/CXCR1                    | IgG2b   |
| CXCR2                | 5E8/CXCR2                    | IgG1    |
| CXCR3                | G025H7                       | IgG1    |
| CXCR6                | K041E5                       | IgG2a   |
| CXCL16               | REA873                       | IgG1    |
| CLA                  | HECA-452                     | IgM rat |
| EOMES                | WD1928                       | IgG1    |
| T-bet                | 4B10                         | IgG1    |
| Interferon- $\gamma$ | B27                          | IgG1    |
| IL-4                 | 3010.211                     | IgG1    |
| IL-17A               | N49-653                      | IgG1    |
| HLA-DR               | L243                         | IgG2a   |
| Ki-67                | 20Raj1                       | IgG1    |
